# Supplementary material for: Electrocatalytic H2O2 production via two-electron O2 reduction by Mo-doped TiO2 nanocrystallines
Source: Royal Society of Chemistry journal article supplement (doi:10.1039/d1cy01466h), 2021-01-01
Supplement: d1cy01466h1.pdf [file d1cy01466h1.pdf]

## Electronic Supplementary Information

### Experiment Section

**Materials:** Sodium molybdate dihydrate ( $\text{Na}_2\text{MoO}_4 \cdot 2\text{H}_2\text{O}$ ), titanium (IV) isopropoxide ( $\text{C}_{12}\text{H}_{28}\text{O}_4\text{Ti}$ ) and potassium hydroxide (KOH) were purchased from Aladdin Industrial Co., isopropyl alcohol ( $\text{C}_3\text{H}_8\text{O}$ ) was obtained from Zhiyuan Chemical Reagent Co.. Nafion solution (5 wt%) was purchased from Sigma-Aldrich. All chemicals were used as received without further purification.

**Synthesis of Mo-TiO<sub>2</sub> and TiO<sub>2</sub>:**  $\text{Na}_2\text{MoO}_4 \cdot 2\text{H}_2\text{O}$  (0.447 g) was dissolved in 20 mL deionized water and vigorously stirred for 10 min. Then 6 mL titanium (IV) isopropoxide was added to the solution drop by drop and continued to stir for 1 h at 80°C. The resulting solution was transferred to a 40 mL Teflon autoclave, and heated at 180°C for 12 h in an oven. The product (Mo-TiO<sub>2</sub>-2) was collected by centrifugation and washed with deionized water and ethanol, and then dried at 60°C in a vacuum oven. Moreover, different proportions of Mo doping were synthesized by the same method (0.212 g  $\text{Na}_2\text{MoO}_4 \cdot 2\text{H}_2\text{O}$  named Mo-TiO<sub>2</sub>-1, 1.007 g  $\text{Na}_2\text{MoO}_4 \cdot 2\text{H}_2\text{O}$  named Mo-TiO<sub>2</sub>-3). For comparison, pure TiO<sub>2</sub> was synthesized by the similar method without  $\text{Na}_2\text{MoO}_4 \cdot 2\text{H}_2\text{O}$ .

**Characterization:** The morphologies and microstructures were investigated by transmission electron microscopy (TEM, FEI TF20). X-ray diffraction (XRD) patterns were obtained from an XRD-6100 (XRD, Shimadzu XRD-6100) with Cu K $\alpha$  source radiation at a scanning rate of 5° min<sup>-1</sup> from 10° to 80°. The surface properties of the samples were studied by X-ray photoelectron spectroscopy (XPS, ESCALABMK II). The absorbance data of spectrophotometer were acquired on Ultraviolet-visible (UV-Vis) spectrophotometer (Shimadzu UV-2700). Electron paramagnetic resonance (EPR) spectra were obtained on a Bruker 500 spectrometer at 77 K.

**Electrochemical measurements:** 10 mg of Mo-TiO<sub>2</sub> or TiO<sub>2</sub> powder was mixed with

20  $\mu\text{L}$  5wt% Nafion solution and ultrasonically dispersed in 0.98 mL isopropyl alcohol solution. Then, 10  $\mu\text{L}$  the catalyst ink was loaded onto a pre-polished glassy carbon electrode ( $D = 5.6 \text{ mm}$ ) of a rotation ring disk electrode (RRDE) to achieve a catalyst loading  $\approx 0.4 \text{ mg cm}^{-2}$ . All electrochemical were carried on CHI 760E (CHI Instruments Inc.). The RRDE loaded with electrocatalyst, graphite rod and Hg/HgO (saturation KOH) were used as the working electrode, counter electrode and reference electrode, respectively. The electrolyte was 0.1 M KOH. The linear sweep voltammetry (LSV) was tested by RRDE scans from 0 to 1.0 V versus reversible hydrogen electrode ( $V_{\text{RHE}}$ ) in  $\text{O}_2$ -saturated 0.1 M KOH at a scan rate of  $10 \text{ mV s}^{-1}$  and a rotation speed of 1600 rpm. During the LSV, the Pt ring potential was held at  $1.2 V_{\text{RHE}}$ . The electrochemical impedance spectroscopy (EIS) was conducted at  $0.65 V_{\text{RHE}}$  from 1,000,000 to 0.1 Hz. The  $\text{H}_2\text{O}_2$  selectivity ( $\text{H}_2\text{O}_2$  (%)) and electron transfer number ( $n$ ) were calculated from the RRDE measurement according to following equation:

$$\text{H}_2\text{O}_2 \text{ (%) } = 200 \times (I_{\text{Ring}}/N) / (I_{\text{Disk}} + I_{\text{Ring}}/N) \quad (1)$$

$$n = 4I_{\text{Disk}} / (I_{\text{Disk}} + I_{\text{Ring}}/N) \quad (2)$$

Where  $I_{\text{Disk}}$  is the measured current of disk electrode,  $I_{\text{Ring}}$  is the measured current of Pt ring electrode,  $N$  is the collection efficiency of Pt ring (0.37).

**Electrogeneration of  $\text{H}_2\text{O}_2$ :** The electrogeneration of  $\text{H}_2\text{O}_2$  were conducted in H-type cell with nafion membrane as separator. Cathode was prepared by depositing catalyst ink (10  $\mu\text{L}$ ,  $10 \text{ mg mL}^{-1}$ ) on a carbon paper (CP) ( $1 \times 1 \text{ cm}$ ). Hg/HgO (saturation KOH) and graphite rod were used as the reference electrode and counter electrode, respectively. The electrolyte was  $\text{O}_2$ -saturated 0.1 M KOH (30 mL).  $\text{H}_2\text{O}_2$  yield was measured by using the indicator of  $\text{Ce}(\text{SO}_4)_2$  ( $2\text{Ce}^{4+} + \text{H}_2\text{O}_2 \rightarrow 2\text{Ce}^{3+} + 2\text{H}^+ + \text{O}_2$ ). Samples (200  $\mu\text{L}$  test electrolyte) were collected at a certain time (1 h) and mixed with the  $\text{Ce}^{4+}$  solution (0.1 mM, 5.8 mL). The mixed solution was detected with UV-vis spectrophotometer. A typical concentration-absorbance curve was calibrated by linear fitting the absorbance values at wavelength length of 318 nm for various standard concentrations of 0.02, 0.04, 0.06, 0.08, 0.1 mM of  $\text{Ce}^{4+}$ . The fitting curve (y

= 4.3365 x - 0.00881,  $R^2= 0.999$ ) shows good linear relation of absorbance value with  $Ce^{4+}$  concentration (Fig. S13). The yield of  $H_2O_2$  was finally determined based on the reduced  $Ce^{4+}$  concentration.

**The density functional theory (DFT) calculation details:** The first principle calculations were performed to reveal the mechanism of ORR on the surface of Mo-TiO<sub>2</sub> by using the Vienna ab initio simulation package (VASP).<sup>1,2</sup> The generalized gradient approximation method of Perdew-Burke-Ernzerhof (PBE) functional was used to describe the exchange-related interaction between electrons.<sup>3</sup> U (Ti<sub>3d</sub>) value of 3.5 eV and U (Mo<sub>3d</sub>) value of 3.0 eV were applied to the Ti<sub>3d</sub> and Mo<sub>3d</sub> states.<sup>4,5</sup> The van der Waals (vdW) correction with the Grimme approach (DFT-D2) was included in the interaction between single molecule/atoms and substrates.<sup>6</sup> The energy cutoff for the plane wave-basis expansion was set to 500 eV. The convergence criteria for the total energy and the Hellmann-Feynman force were 10<sup>-5</sup> eV and 0.02 eVÅ<sup>-1</sup>, respectively. The TiO<sub>2</sub> (101) surface was modeled using a 2 × 2 slab with four trilayers (O-Ti-O) that the bottom trilayer is fixed, separated by 15 Å of vacuum. The Brillouin zone was sampled with 3 × 3 × 1 Gamma-center k-point mesh.

The formation energies of oxygen vacancy on Mo-TiO<sub>2</sub> (101) are defined as an equation:

$$E_f = E(Mo-TiO_m) + E(O_2)/2 - E(Mo-TiO_{m-1}) \quad (3)$$

Where  $E_f$  is the formation energy,  $E(Mo-TiO_m)$  and  $E(Mo-TiO_{m-1})$  is the total energies without and with oxygen vacancy,  $E(O_2)$  is the total energy of single oxygen gas,  $m$  is the number of O atoms in surface supercell.

The computational hydrogen electrode model has been adopted for calculations of the Gibbs free-energy change for the relevant elemental steps, which can be obtained by  $\Delta G = \Delta E + \Delta E_{ZPE} - T\Delta S$ , where  $\Delta E$  is the total energy,  $\Delta E_{ZPE}$  is the zero point energy and  $S$  is the entropy at 298.15 K. The theoretical overpotential ( $\eta$ ) of 2e<sup>-</sup> ORR was deduced using the equation of  $\eta = |\Delta G_{*OOH}/e - 4.22 \text{ V}|$ . The solvation effect was not considered in determining the value of  $\Delta G_{*OOH}$ , which governs a

reasonable comparison.

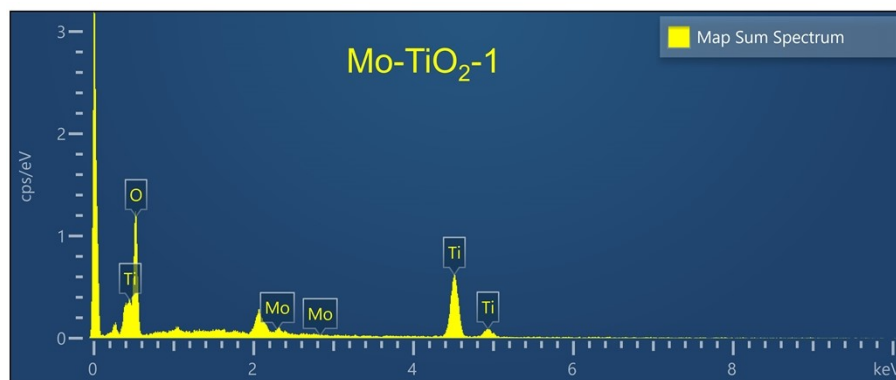

| Element | Line Type | Apparent Concentration | k Ratio | Wt%    | Atomic % |
|---------|-----------|------------------------|---------|--------|----------|
| O       | K series  | 66.54                  | 0.22390 | 37.33  | 64.71    |
| Ti      | K series  | 117.38                 | 1.17377 | 59.24  | 34.30    |
| Mo      | L series  | 6.06                   | 0.06058 | 3.43   | 0.99     |
| Total:  |           |                        |         | 100.00 | 100.00   |

**Fig. S1.** EDX spectrum of Mo-TiO<sub>2</sub>-1.

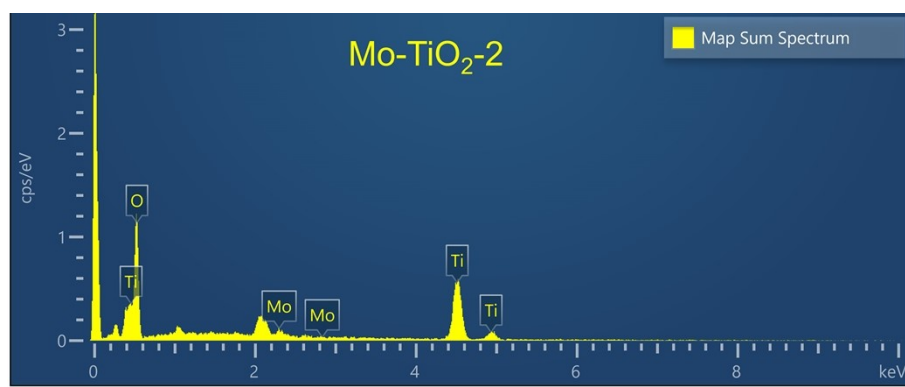

| Element | Line Type | Apparent Concentration | k Ratio | Wt%    | Atomic % |
|---------|-----------|------------------------|---------|--------|----------|
| O       | K series  | 64.33                  | 0.21648 | 37.38  | 64.96    |
| Ti      | K series  | 110.42                 | 1.10415 | 58.12  | 33.73    |
| Mo      | L series  | 7.61                   | 0.07614 | 4.50   | 1.30     |
| Total:  |           |                        |         | 100.00 | 100.00   |

**Fig. S2.** EDX spectrum of Mo-TiO<sub>2</sub>-2.

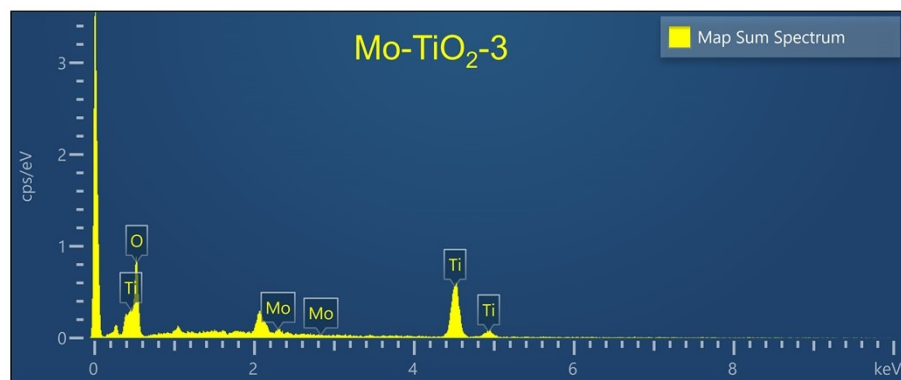

| Element | Line Type | Apparent Concentration | k Ratio | Wt%    | Atomic % |
|---------|-----------|------------------------|---------|--------|----------|
| O       | K series  | 46.52                  | 0.15654 | 31.04  | 58.25    |
| Ti      | K series  | 117.19                 | 1.17192 | 64.27  | 40.28    |
| Mo      | L series  | 7.60                   | 0.07605 | 4.69   | 1.47     |
| Total:  |           |                        |         | 100.00 | 100.00   |

**Fig. S3.** EDX spectrum of Mo-TiO<sub>2</sub>-3.

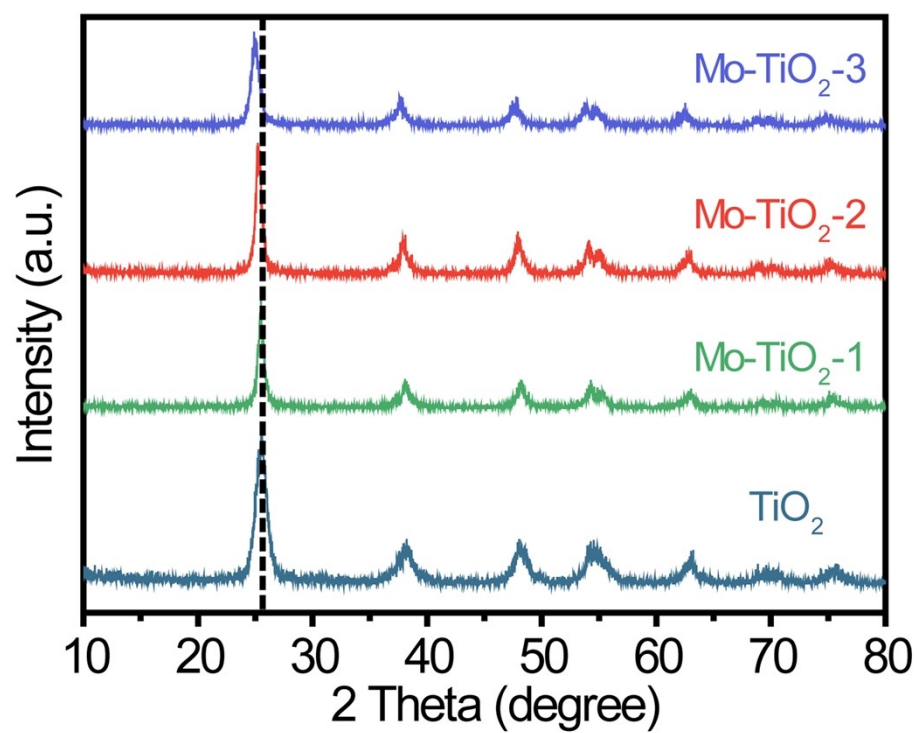

**Fig. S4.** XRD patterns of TiO<sub>2</sub>, Mo-TiO<sub>2</sub>-1, Mo-TiO<sub>2</sub>-2 and Mo-TiO<sub>2</sub>-3.



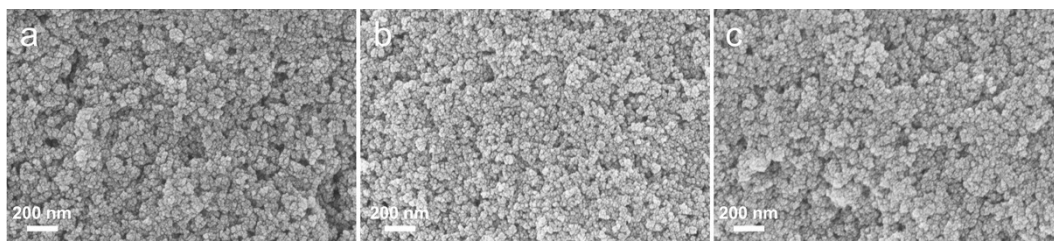

**Fig. S5.** SEM images of (a) Mo-TiO<sub>2</sub>-1, (b) Mo-TiO<sub>2</sub>-2 and (c) Mo-TiO<sub>2</sub>-3.

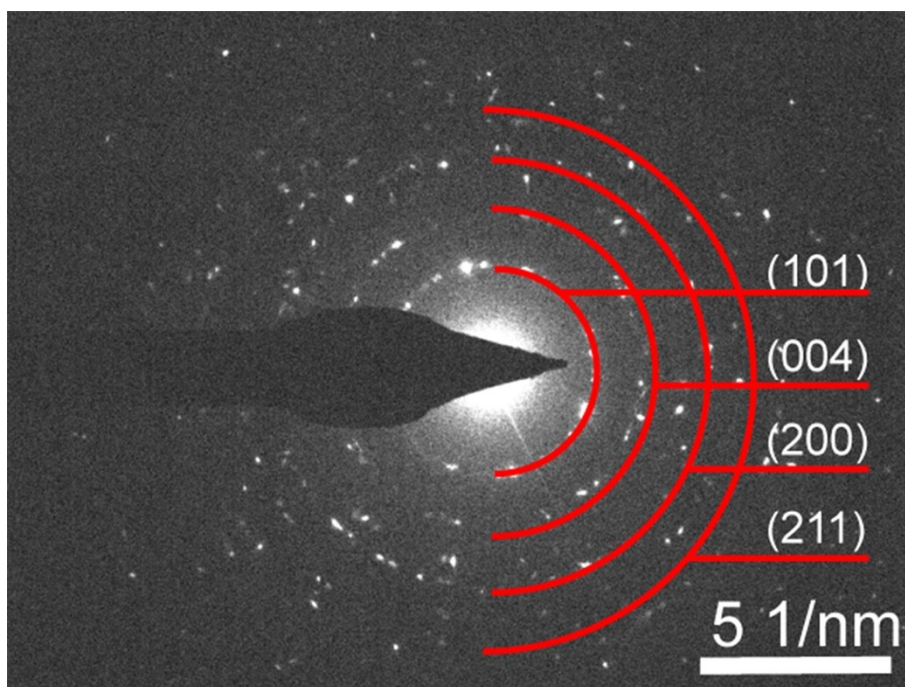

**Fig. S6.** SAED pattern of Mo-TiO<sub>2</sub>-2.

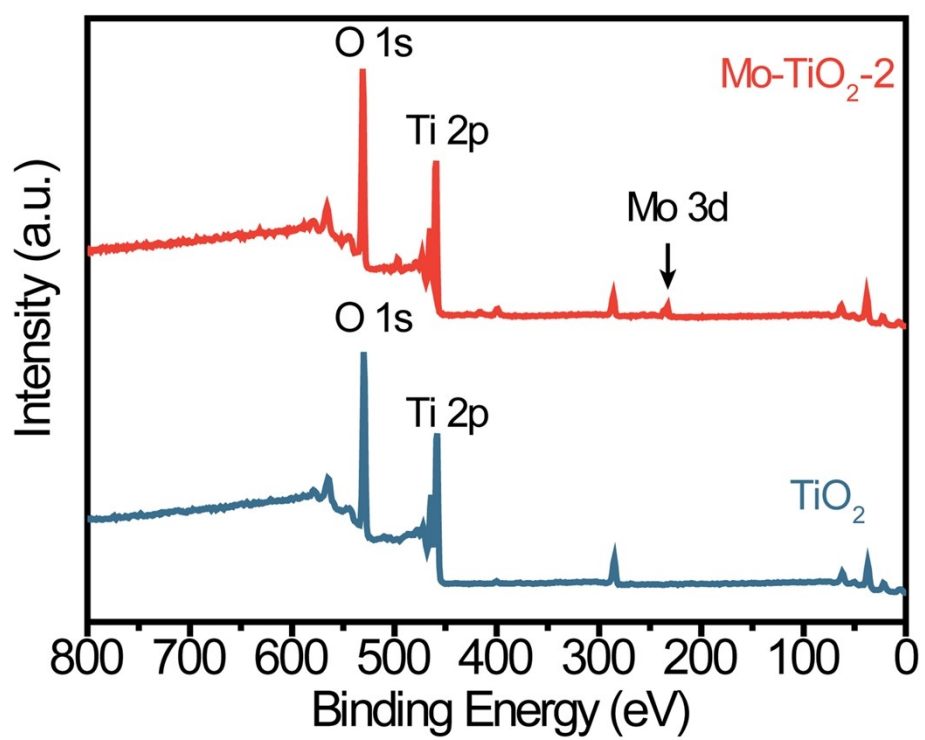

**Fig. S7.** Survey XPS spectra of  $\text{TiO}_2$  and  $\text{Mo-TiO}_2\text{-2}$ .

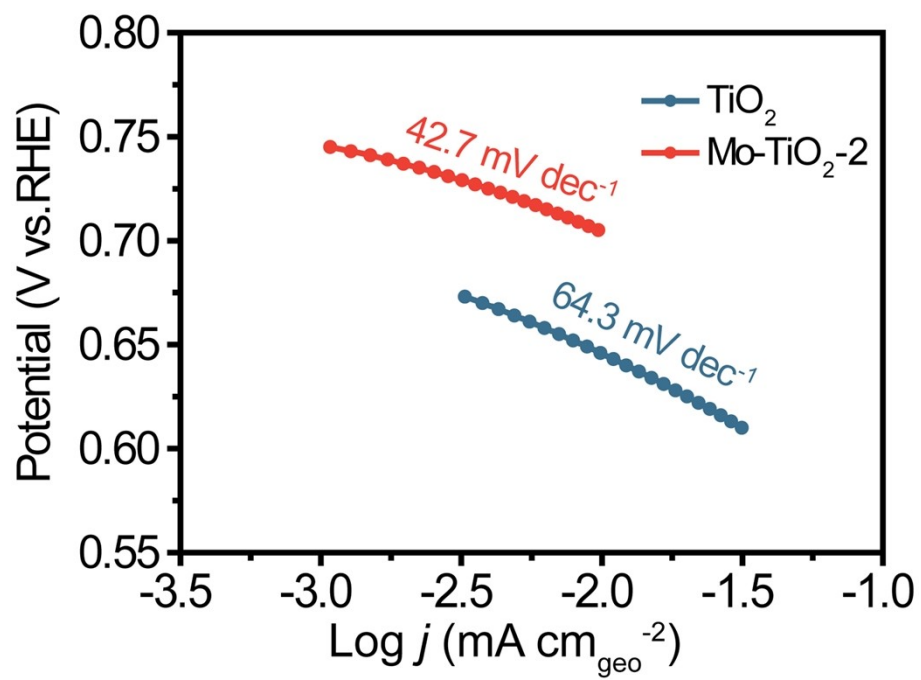

**Fig. S8.** Tafel plots of  $\text{TiO}_2$  and  $\text{Mo-TiO}_2\text{-2}$  in 0.1 M KOH.

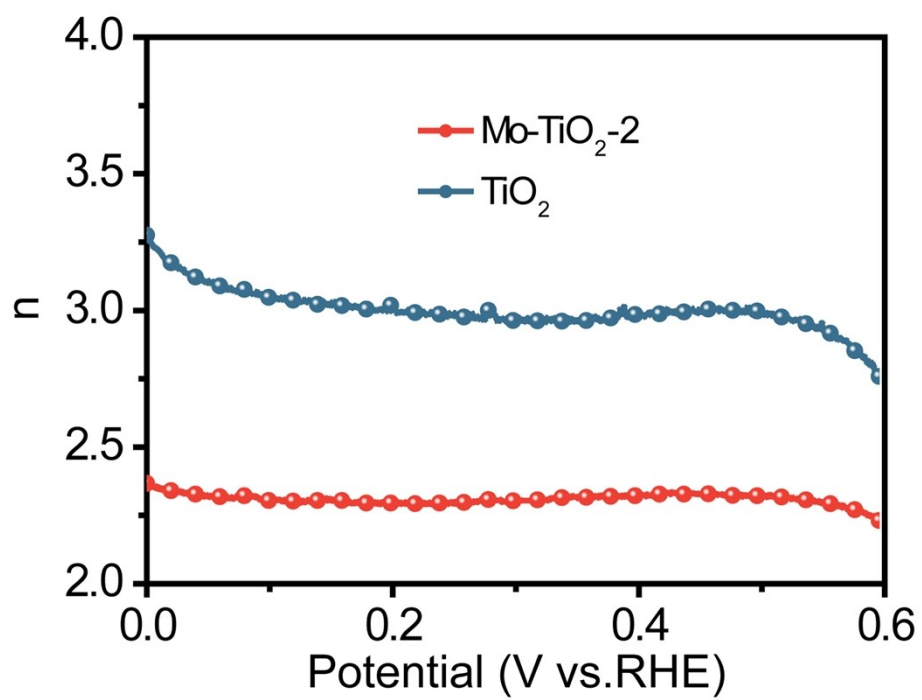

**Fig. S9.** Electron transfer numbers (n) for TiO<sub>2</sub> and Mo-TiO<sub>2</sub>-2.

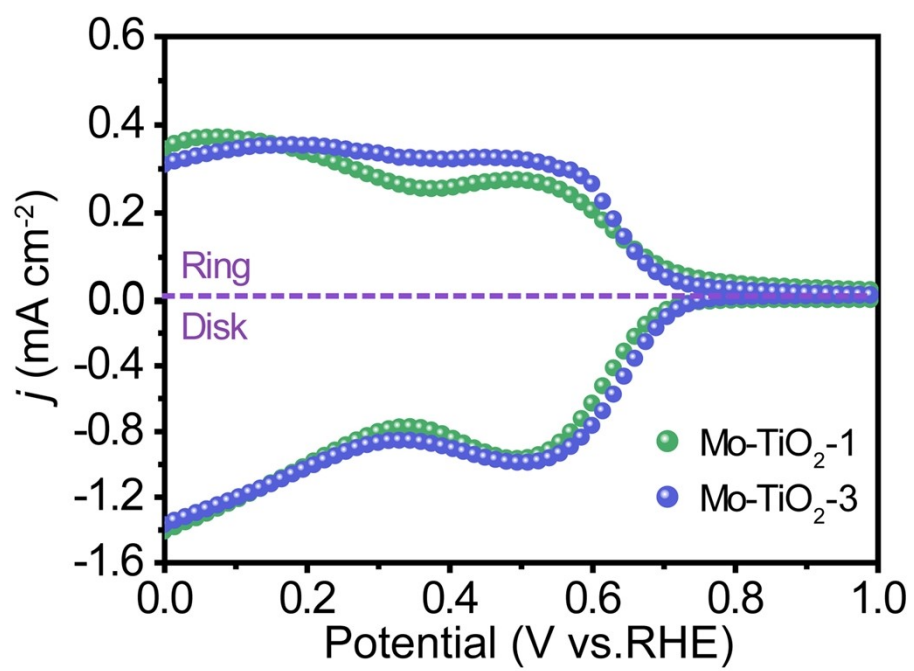

**Fig. S10.** LSV curves of Mo-TiO<sub>2</sub>-1 and Mo-TiO<sub>2</sub>-3.

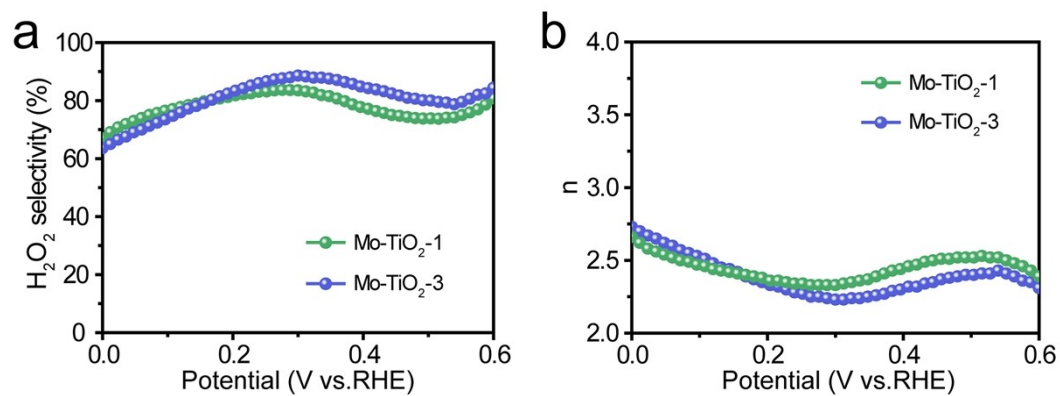

**Fig. S11.** (a) H<sub>2</sub>O<sub>2</sub> selectivity and (b) electron transfer numbers (n) of Mo-TiO<sub>2</sub>-1 and Mo-TiO<sub>2</sub>-3.

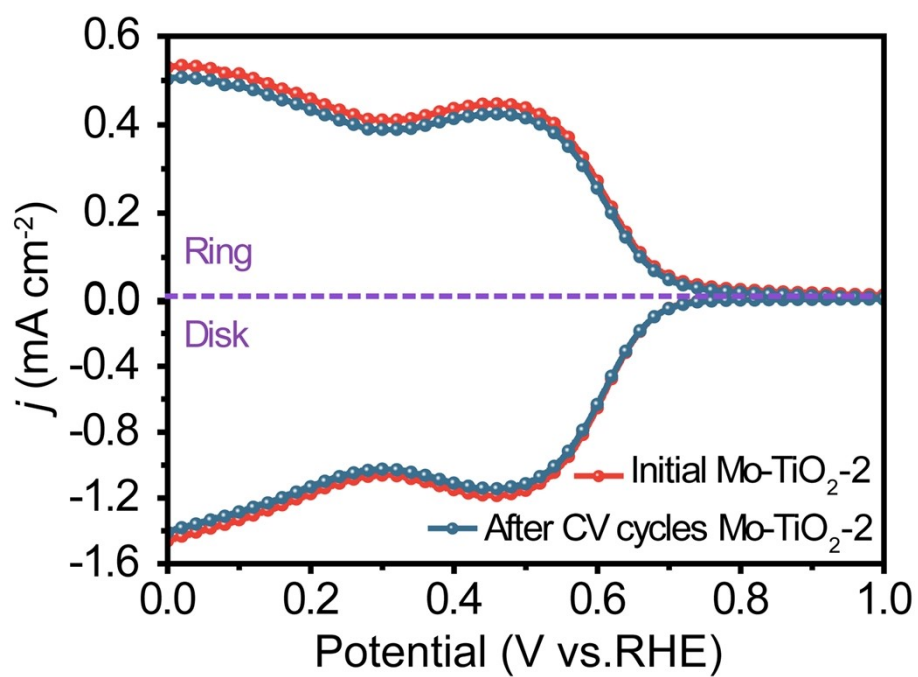

**Fig. S12.** LSV curves of Mo-TiO<sub>2</sub>-2 for 3000 CV cycles before and after.



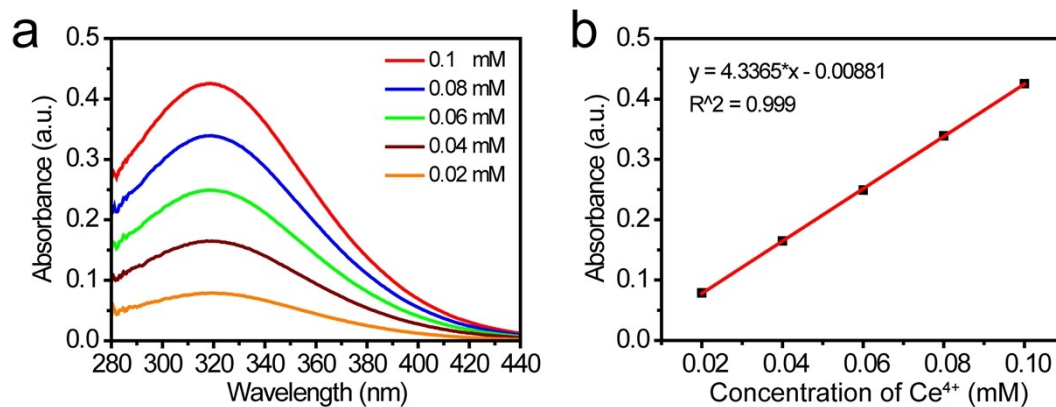

**Fig. S13.** (a) UV-Vis spectra of  $\text{Ce}^{4+}$  solution with various concentrations and (b) corresponding standard curve.

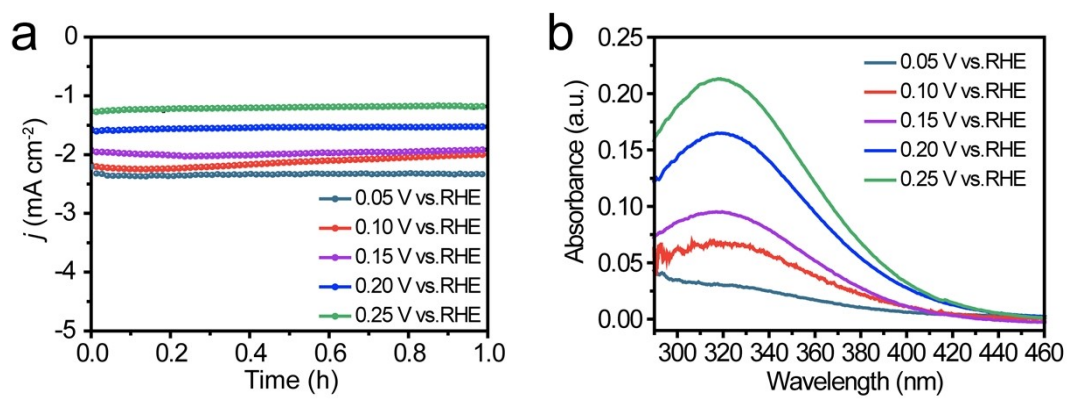

**Fig. S14.** (a) Time-dependent current density curves of Mo-TiO<sub>2</sub>-2 under various potentials for 1 h. (b) UV-Vis spectra of electrolyte with various potential.

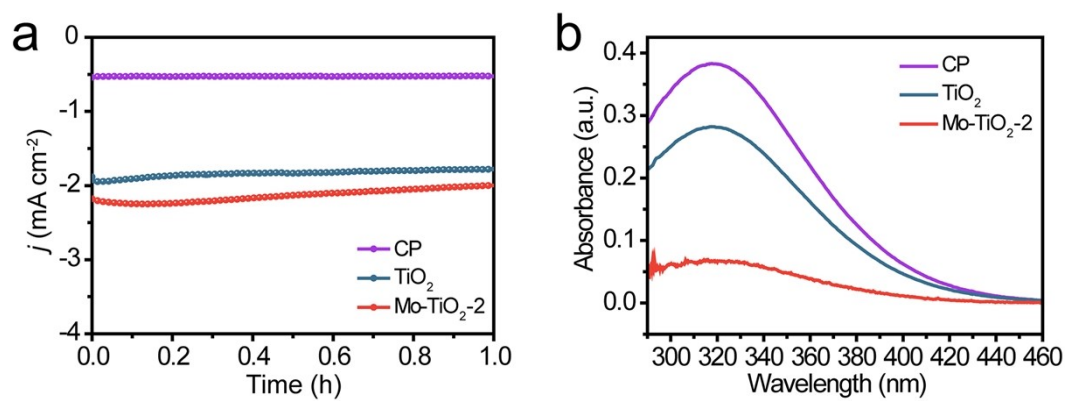

**Fig. S15.** (a) Time-dependent current density curves of pure CP, TiO<sub>2</sub> and Mo-TiO<sub>2</sub>-2 for 1 h. (b) UV-Vis spectra of electrolyte for pure CP, TiO<sub>2</sub> and Mo-TiO<sub>2</sub>-2.

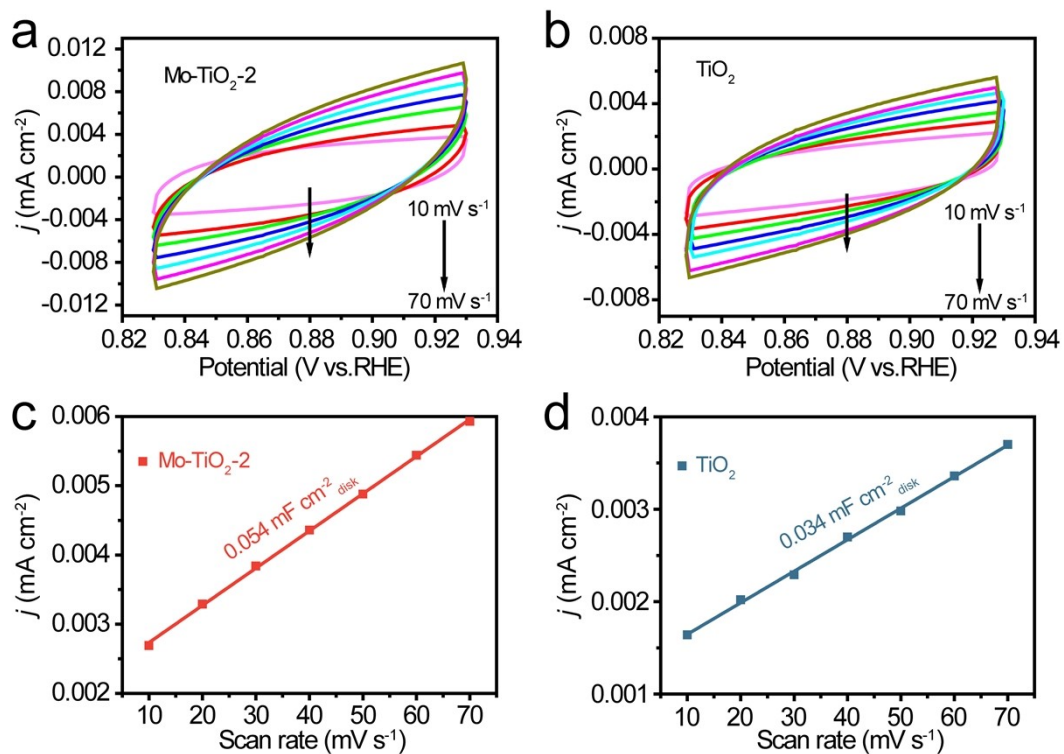

**Fig. S16.** CV curves for (a) Mo-TiO<sub>2</sub>-2 and (b) TiO<sub>2</sub> in the double layer region at scan rates of 10, 20, 30, 40, 50, 60 and 70 mV s<sup>-1</sup> in 0.1 M KOH. Capacitive currents as a function of scan rate for (c) Mo-TiO<sub>2</sub>-2 and (d) TiO<sub>2</sub> at 0.88 V<sub>RHE</sub>.

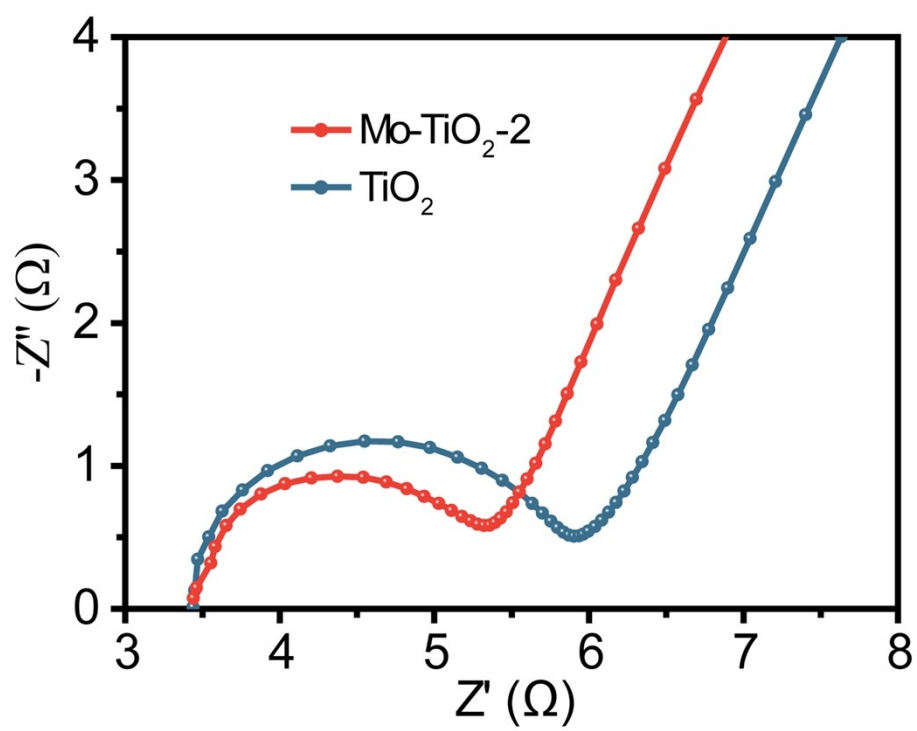

**Fig. S17.** Nyquist plots of  $\text{TiO}_2$  and  $\text{Mo-TiO}_2\text{-2}$ .

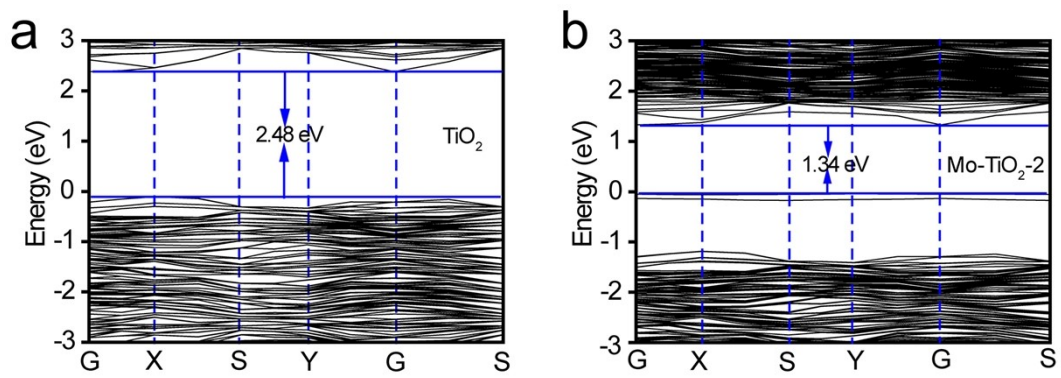

**Fig. S18.** Band structures of (a)  $\text{TiO}_2$  and (b)  $\text{Mo-TiO}_2\text{-2}$ .

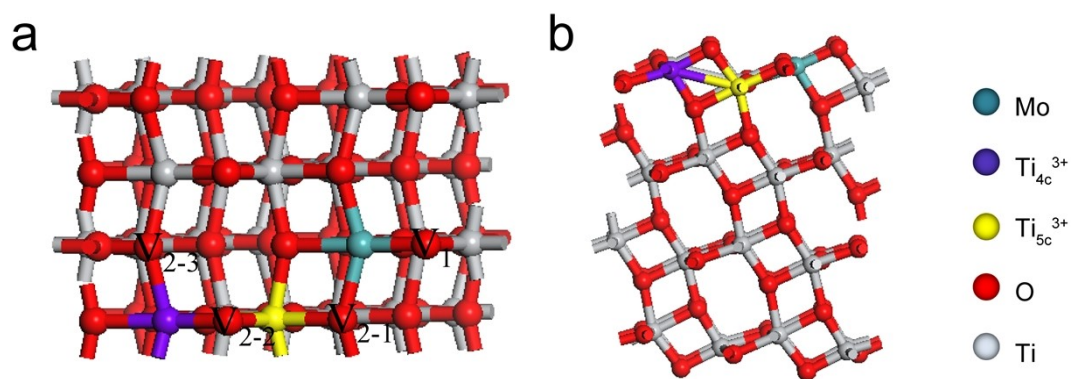

**Fig. S19.** (a) Front view and (b) vertical view of possible oxygen vacancy distributions of Mo-TiO<sub>2</sub> (101) surface.

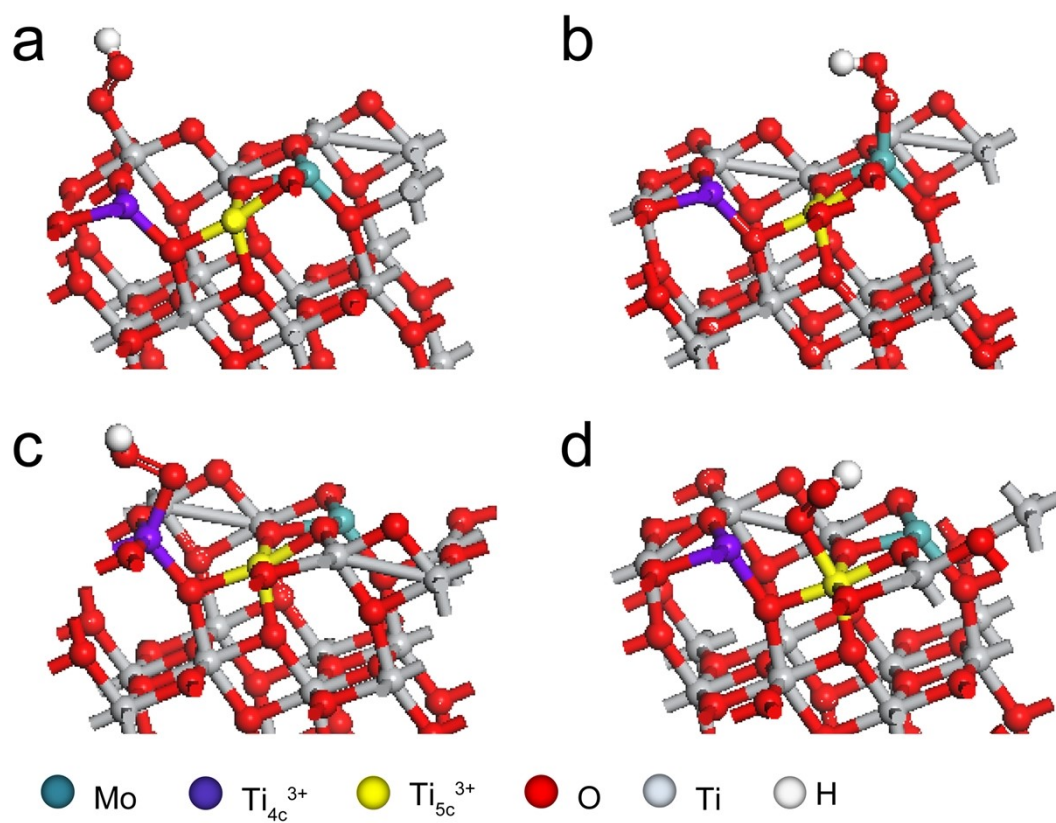

**Fig. S20.** Atom configurations of the \*OOH absorption at (a)  $\text{Ti}^{4+}$ , (b) Mo, (c)  $\text{Ti}_{4c}^{3+}$  and (d)  $\text{Ti}_{5c}^{3+}$  sites.



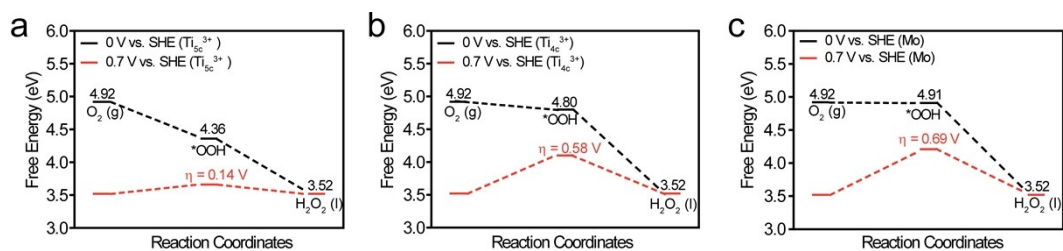

**Fig. S21.** Free energy diagrams with the theoretical overpotentials ( $\eta$ ) of the  $2e^-$  ORR at the zero potential (black line) and the equilibrium potential (red line) for (a)  $\text{Ti}_{5c}^{3+}$ , (b)  $\text{Ti}_{4c}^{3+}$  and (c) Mo sites.

**Table S1.** Comparison of performance for Mo-TiO<sub>2</sub> with other reported 2e<sup>-</sup> ORR electrocatalysts.

| Catalyst                                                                                 | Electrolyte                                     | Selectivity@potential<br>(% @ V <sub>RHE</sub> ) | Productivity                                              | Ref.      |
|------------------------------------------------------------------------------------------|-------------------------------------------------|--------------------------------------------------|-----------------------------------------------------------|-----------|
| Mo-TiO <sub>2</sub> -2                                                                   | 0.1 M KOH                                       | 86@0.2                                           | 395.3 mmol g <sub>cat</sub> <sup>-1</sup> h <sup>-1</sup> | This work |
| TiO <sub>2</sub>                                                                         |                                                 | 52@0.3                                           | 134.1 mmol g <sub>cat</sub> <sup>-1</sup> h <sup>-1</sup> |           |
| TiO <sub>2</sub> -Au/C 3%                                                                | 1.0 M NaOH                                      | 75                                               | /                                                         | 7         |
| Au/TiO <sub>2</sub>                                                                      | 0.1 M KOH                                       | 90@0.1                                           | /                                                         | 8         |
| CuO <sub>x</sub> /G-30                                                                   | 1.0 M KOH                                       | 80@0.5                                           | /                                                         | 9         |
| Fe <sub>3</sub> O <sub>4</sub> /Printex                                                  | 1.0 M KOH                                       | 68@0.4                                           | /                                                         | 10        |
| Fe <sub>3</sub> O <sub>4</sub> /graphene                                                 |                                                 | 62@0.4                                           | /                                                         |           |
| Nb <sub>2</sub> O <sub>5</sub> -rGO                                                      | 0.1 M NaOH                                      | 74.9@0.4                                         | /                                                         | 11        |
| 4% CeO <sub>2</sub> /C-PPM-P                                                             | 1.0 M NaOH                                      | 88                                               | /                                                         | 12        |
| Sr <sub>0.7</sub> Na <sub>0.3</sub> Si <sub>0.95</sub> Cu <sub>0.05</sub> O <sub>3</sub> | 0.1 M KOH                                       | 78@0.4                                           | /                                                         | 13        |
| O-CNTs                                                                                   | 0.1 M KOH                                       | 88@0.4                                           | 111.7 mmol g <sub>cat</sub> <sup>-1</sup> h <sup>-1</sup> | 14        |
| HPCS-S                                                                                   | 0.1 M KOH                                       | 71@0.4                                           | 0.184 mol g <sub>cat</sub> <sup>-1</sup> h <sup>-1</sup>  | 15        |
| CoI-NG(O)                                                                                | 0.1 M KOH                                       | 80@0.4                                           | ~418 mmol g <sub>cat</sub> <sup>-1</sup> h <sup>-1</sup>  | 16        |
| Ni MOF NSs-6                                                                             | 0.1 M KOH                                       | 95@0.5                                           | 80 mmol g <sub>cat</sub> <sup>-1</sup> h <sup>-1</sup>    | 17        |
| rGO/PEI                                                                                  | 0.1 M KOH                                       | 90.7@0.74                                        | 0.106 mol g <sub>cat</sub> <sup>-1</sup> h <sup>-1</sup>  | 18        |
| OCB-120                                                                                  | 0.1 M KOH                                       | 63.5@0.36                                        | /                                                         | 19        |
| G/CDs                                                                                    | 0.1 M KOH                                       | 71-82@0.35-0.72                                  | /                                                         | 20        |
| oxo-G/NH <sub>3</sub> ·H <sub>2</sub> O                                                  | 0.1 M KOH                                       | >82                                              | 224.8 mmol g <sub>cat</sub> <sup>-1</sup> h <sup>-1</sup> | 21        |
| G-COF-950                                                                                | 0.1 M KOH                                       | 75                                               | 1286.9 mmol g <sup>-1</sup> h <sup>-1</sup>               | 22        |
| 5-Ni <sub>3</sub> (HITP) <sub>2</sub>                                                    | 0.1 M KOH                                       | 80                                               | /                                                         | 23        |
| Pt-Ag alloy                                                                              | 0.05 M Na <sub>2</sub> SO <sub>4</sub> (pH = 3) | 70-90                                            | 236.25 mol kg <sup>-1</sup> h <sup>-1</sup>               | 24        |
| Pd <sup>δ+</sup> -OCNT                                                                   | 0.1 M HClO <sub>4</sub>                         | 95-98@0.3-0.7                                    | 1701 mol kg <sup>-1</sup> h <sup>-1</sup>                 | 25        |
| Pt-Hg                                                                                    | 0.1 M HClO <sub>4</sub>                         | 96@0.2-0.4                                       | /                                                         | 26        |
| a-TiO <sub>2-x</sub> /TiC                                                                | 0.1 M KOH                                       | 94@0.5                                           | 7.19 mol g <sub>cat</sub> <sup>-1</sup> h <sup>-1</sup>   | 27        |

## References

- 1 G. Kresse and J. Furthmüller, *Comp. Mater. Sci.*, 1996, **6**, 15–50.
- 2 G. Kresse and J. Furthmüller, *Phys. Rev. B*, 1996, **54**, 11169.
- 3 J. P. Perdew, K. Burke and M. Ernzerhof, *Phys. Rev. Lett.*, 1996, **77**, 3865–3868.
- 4 A. Tilocca and A. Selloni, *J. Phys. Chem. C*, 2012, **116**, 9114–9121.
- 5 M. García-Mota, A. Vojvodic, F. Abild-Pedersen and J. K. Nørskov, *J. Phys. Chem. C*, 2013, **117**, 460–465.
- 6 S. Grimme, J. Antony, S. Ehrlich and H. Krieg, *J. Chem. Phys.*, 2010, **132**, 154104.
- 7 F. V. E. Reis, V. S. Antonin, P. Hammer, M. C. Santos and P. H. C. Camargo, *J. Catal.*, 2015, **326**, 100–106.
- 8 Z. Sun, L. Sheng, H. Gong, L. Song, X. Jiang, S. Wang, X. Meng, T. Wang and J. He, *Chem. Asian J.*, 2020, **15**, 4280–4285.
- 9 H. Xiao, B. Li, M. Zhao, Y. Li, T. Hu, J. Jia and H. Wu, *Chem. Commun.*, 2021, **57**, 4118–4121.
- 10 W. R. P. Barros, Q. Wei, G. Zhang, S. Sun, M. R. V. Lanza and A. C. Tavares, *Electrochim. Acta*, 2015, **162**, 263–270.
- 11 J. F. Carneiro, M. J. Paulo, M. Siaj, A. C. Tavares and M. R. V. Lanza, *J. Catal.*, 2015, **332**, 51–61.
- 12 M. H. M. T. Assumpção, A. Moraes, R. F. B. D. Souza, M. L. Calegari, M. R. V. Lanza, E. R. Leite and M. A. L. Cordeiro, *Electrochim. Acta*, 2013, **111**, 339–343.
- 13 S. Thundiyil, S. Kurungot and R. N. Devi, *ACS Appl. Mater. Interfaces*, 2021, **13**, 382–390.
- 14 Z. Lu, G. Chen, S. Siahrostami, Z. Chen, K. Liu, J. Xie, L. Liao, T. Wu, D. Lin, Y. Liu, T. F. Jaramillo, J. K. Nørskov and Y. Cui, *Nat. Catal.*, 2018, **1**, 156–162.
- 15 G. Chen, J. Liu, Q. Li, P. Guan, X. Yu, L. Xing, J. Zhang and R. Che, *Nano Res.*, 2019, **12**, 2614–2622.
- 16 E. Jung, H. Shin, B. H. Lee, V. Efremov, S. Lee, H. S. Lee, J. Kim, W. H. Antink,

- S. Park, K. S. Lee, S. P. Cho, J. S. Yoo, Y. E. Sung and T. Hyeon, *Nat. Mater.*, 2020, **19**, 436–442.
- 17 M. Wang, X. Dong, Z. Meng, Z. Hu, Y. Lin, C. Peng, H. Wang, C. Pao, S. Ding, Y. Li, Q. Shao and X. Huang, *Angew. Chem. Int. Ed.*, 2021, **60**, 11190–11195.
  - 18 X. Xiao, T. Wang, J. Bai, F. Li, T. Ma and Y. Chen, *ACS Appl. Mater. Interfaces*, 2018, **10**, 42534–42541.
  - 19 X. Lu, D. Wang, K.-H. Wu, X. Guo and W. Qi, *J. Colloid Interface Sci.*, 2020, **573**, 376–383.
  - 20 Y. Dong, J. Su, S. Zhou, M. Wang, S. Huang, C.-H. Lu, H. Yang and F. Fu, *Chem. Commun.*, 2020, **56**, 7609–7612.
  - 21 L. Han, Y. Sun, S. Li, C. Cheng, C. E. Halbig, P. Feicht, J. L. Hübner, P. Strasser and S. Eigler, *ACS Catal.*, 2019, **9**, 1283–1288.
  - 22 J. Zhang, G. Zhang, S. Jin, Y. Zhou, Q. Ji, H. Lan, H. Liu and J. Qu, *Carbon*, 2020, **163**, 154–161.
  - 23 M. Liu, H. Zhang, Y. Li, H. Su, W. Zhou, X. Zhao, W. Cheng and Q. Liu, *Chem. Commun.*, 2020, **56**, 5299–5302.
  - 24 Y.-J. Ko, K. Choi, B. Yang, W. H. Lee, J.-Y. Kim, J.-W. Choi, K. H. Chae, J. H. Lee, Y. J. Hwang, B. K. Min, H.-S. Oh and W.-S. Lee, *J. Mater. Chem. A*, 2020, **8**, 9859–9870.
  - 25 Q. Chang, P. Zhang, A. H. B. Mostaghimi, X. Zhao, S. R. Denny, J. H. Lee, H. Gao, Y. Zhang, H. L. Xin, S. Siahrostami, J. G. Chen and Z. Chen, *Nat. Commun.*, 2020, **11**, 2178.
  - 26 S. Siahrostami, A. Verdaguer-Casadevall, M. Karamad, D. Deiana, P. Malacrida, B. Wickman, M. Escudero-Escribano, E. A. Paoli, R. Frydendal, T. W. Hansen, I. Chorkendorff, I. E. L. Stephens and J. Rossmeisl, *Nat. Mater.*, 2013, **12**, 1137–1143.
  - 27 Z. Xu, J. Liang, Y. Wang, K. Dong, X. Shi, Q. Liu, Y. Luo, T. Li, Y. Jia, A. M. Asiri, Z. Feng, Y. Wang, D. Ma and X. Sun, *ACS Appl. Mater. Interfaces*, 2021, **13**, 33182–33187.
